# Supplementary material for: Contribution of photocatalytic and Fenton-based processes in nanotwin structured anodic TiO2 nanotube layers modified by Ce and V
Source: Royal Society of Chemistry journal article supplement (doi:10.1039/d2dt00829g), 2022-01-01
Supplement: d2dt00829g1.pdf [file d2dt00829g1.pdf]

ARTICLE

ELECTRONIC SUPPLEMENTARY INFORMATION

**Contribution of photocatalytic and Fenton-based processes in nanotwin structured anodic TiO<sub>2</sub> nanotube layers modified by Ce and V**

Guru Karthikeyan Thirunavukkarasu,<sup>a†</sup> Sridhar Gowrisankaran,<sup>a†</sup> Maria Caplovicova,<sup>b</sup> Leonid Satrapinsky,<sup>c</sup> Maros Gregor,<sup>c</sup> Aleksandra Lavrikova,<sup>d</sup> Jan Gregus,<sup>e</sup> Radoslav Halko,<sup>e</sup> Gustav Plesch,<sup>a</sup> Martin Motola <sup>a</sup> and Olivier Monfort <sup>\*a</sup>

<sup>a</sup> Department of Inorganic Chemistry, Faculty of Natural Sciences, Comenius University in Bratislava, Ilkovicova 6, Mlynska Dolina, 84215 Bratislava, Slovakia.

<sup>b</sup> STU Center for Nanodiagnostics, Faculty of Materials Science and Technology in Trnava, Slovak University of Technology in Bratislava, Vazovova 5, 81243 Bratislava, Slovakia.

<sup>c</sup> Department of Experimental Physics, Faculty of Mathematics Physics and Informatics, Comenius University in Bratislava, Mlynska Dolina, 84248 Bratislava, Slovakia.

<sup>d</sup> Division of Environmental Physics, Faculty of Mathematics Physics and Informatics, Comenius University in Bratislava, Mlynska Dolina, 84248 Bratislava, Slovakia.

<sup>e</sup> Department of Analytical Chemistry, Faculty of Natural Sciences, Comenius University in Bratislava, Ilkovicova 6, Mlynska Dolina, 84215 Bratislava, Slovakia.

<sup>†</sup>These authors have contributed equally to the work.

\*Corresponding author: Dr. Olivier Monfort; [monfort1@uniba.sk](mailto:monfort1@uniba.sk); +421(0)290142141

**Table S1:** Experimental conditions for ICP-MS analysis.

|                                   | <b>Parameters</b>              | <b>Settings</b> |              |
|-----------------------------------|--------------------------------|-----------------|--------------|
| Gas flow (L min <sup>-1</sup> )   | Plasma flow                    | 15.0            |              |
|                                   | Auxiliary flow                 | 1.65            |              |
|                                   | Nebulizer flow                 | 1.00            |              |
|                                   | Sheath flow                    | 0,14            |              |
| CRI Gases (mL min <sup>-1</sup> ) | Skimmer (with He)              | 0               |              |
|                                   | Skimmer (with H <sub>2</sub> ) | 0               |              |
| RF                                | RF Power (kW)                  | 1.30            |              |
| Sample Introduction               | Sampling depth (mm)            | 6.5             |              |
|                                   | Pump rate (rpm)                | 5               |              |
|                                   | Stabilization time (s)         | 90              |              |
|                                   | Spray chamber (°C)             | 3               |              |
| Ion Optics (volts)                | 1st Extraction lens            | -1              |              |
|                                   | 2nd Extraction lens            | -85             |              |
|                                   | 3rd Extraction lens            | -175            |              |
|                                   | Corner lens                    | -197            |              |
|                                   | Mirror lens left               | 22              |              |
|                                   | Mirror lens right              | 25              |              |
|                                   | Mirror lens bottom             | 25              |              |
|                                   | Entrance lens                  | 0               |              |
|                                   | Entrance plate                 | -10             |              |
|                                   | Fringe bias                    | -1.0            |              |
|                                   | Pole bias                      | 0               |              |
|                                   | Quadrupole scan                | Scan mode       | Peak hopping |
|                                   |                                | Dwell time (ms) | 20           |
| Points per peak                   |                                | 1               |              |
| Scans/Replicate                   |                                | 50              |              |
| Replicates/Sample                 |                                | 5               |              |

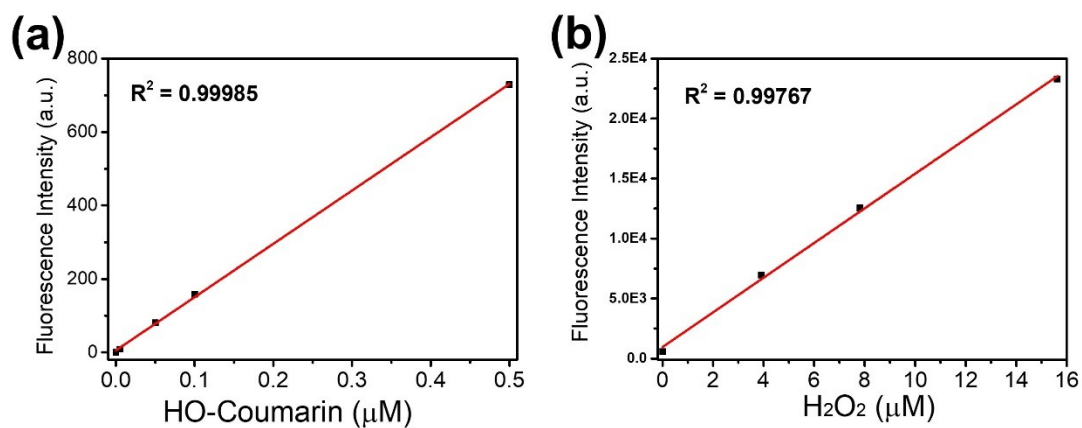

**Figure S1:** (a) Standard curve for HO• detection i.e. using different concentrations of fluorescent hydroxycoumarin (since coumarin is the probe molecule). (b) Standard curve for H<sub>2</sub>O<sub>2</sub> detection i.e. using different concentrations of H<sub>2</sub>O<sub>2</sub> in the presence hydroxyphenylacetic acid as probe molecule (thus forming fluorescent HPAA dimer in the presence of peroxidase).

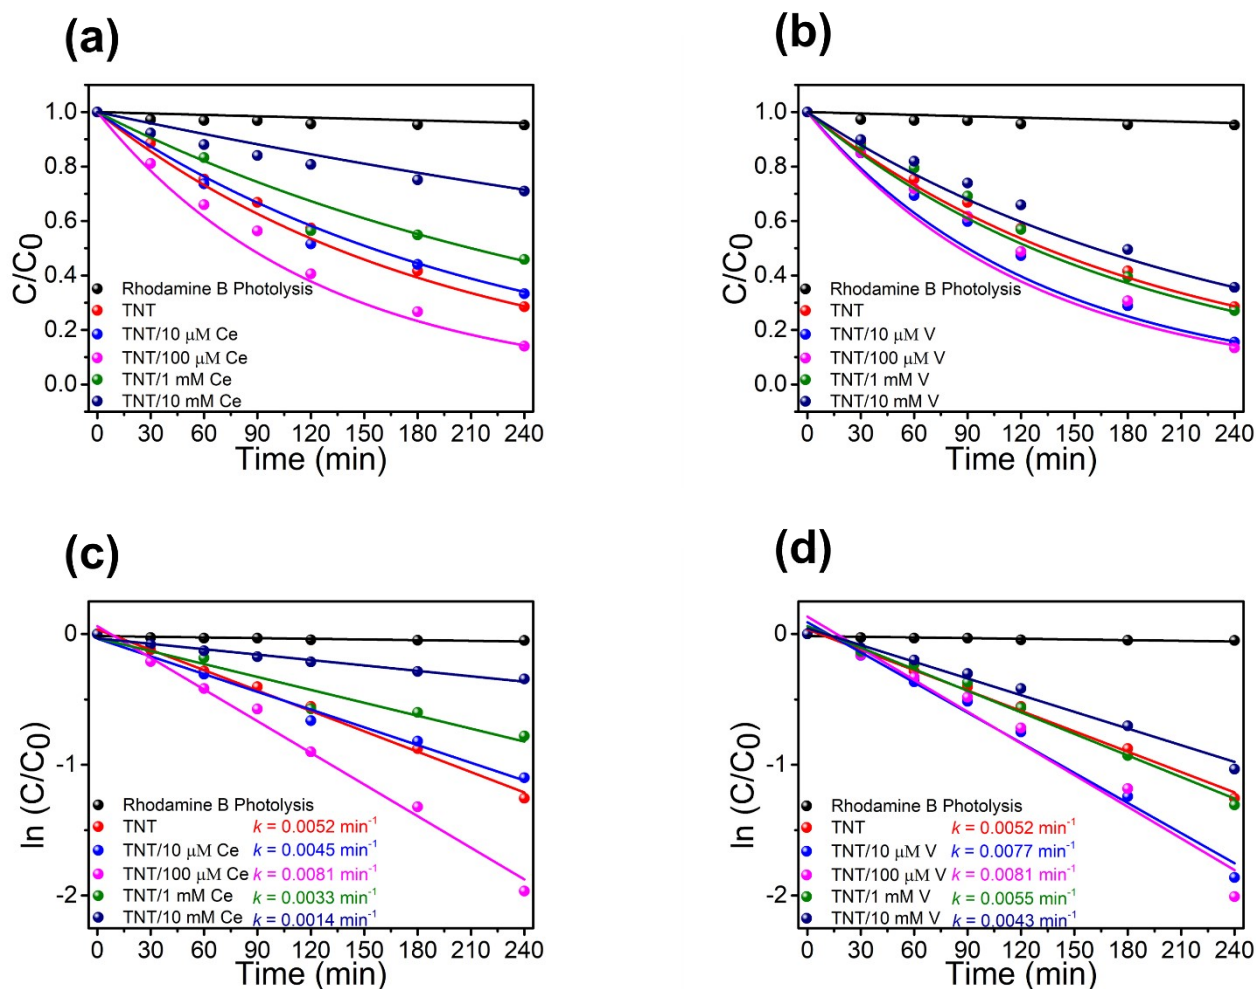

**Figure S2:** Optimization of Rhodamine B photodegradation at normal pH (i.e. pH was not altered) with a different surface dopant concentration of Ce or V on TNT. (a) & (b)  $C/C_0$  of Ce doped TNT and V doped TNT, respectively. (c) & (d) Linearized pseudo-first-order plots of  $\ln(C/C_0)$  versus time for Ce doped TNT and V doped TNT, respectively.

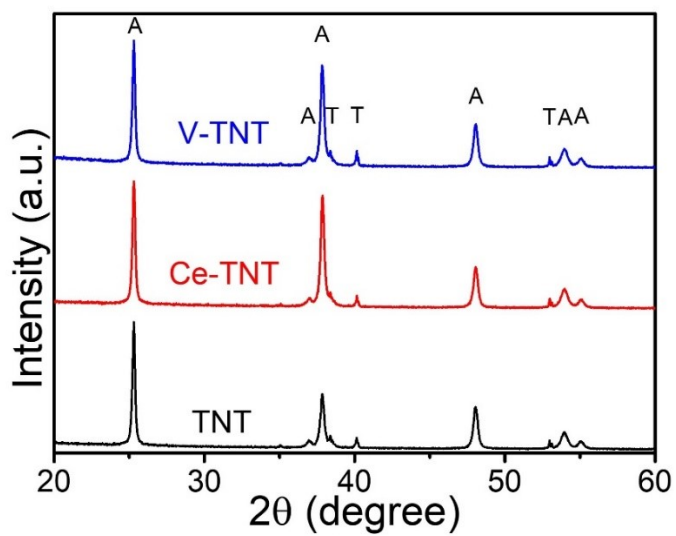

**Figure S3:** XRD patterns of TNT, Ce-TNT and V-TNT. The diffraction patterns labelled as A and T denotes  $\text{TiO}_2$  anatase phase and metallic Ti, respectively.

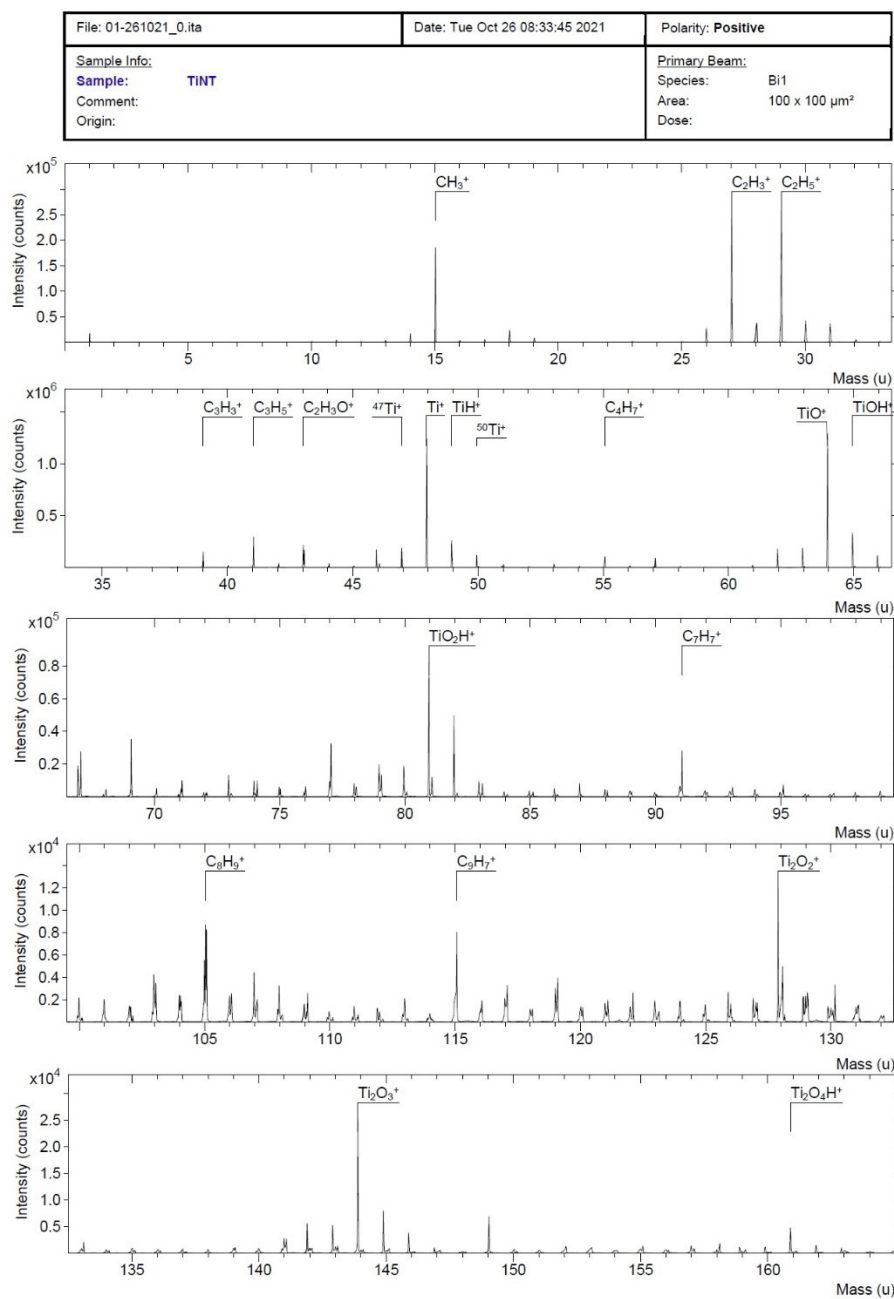

Figure S4a: SIMS of TNT.

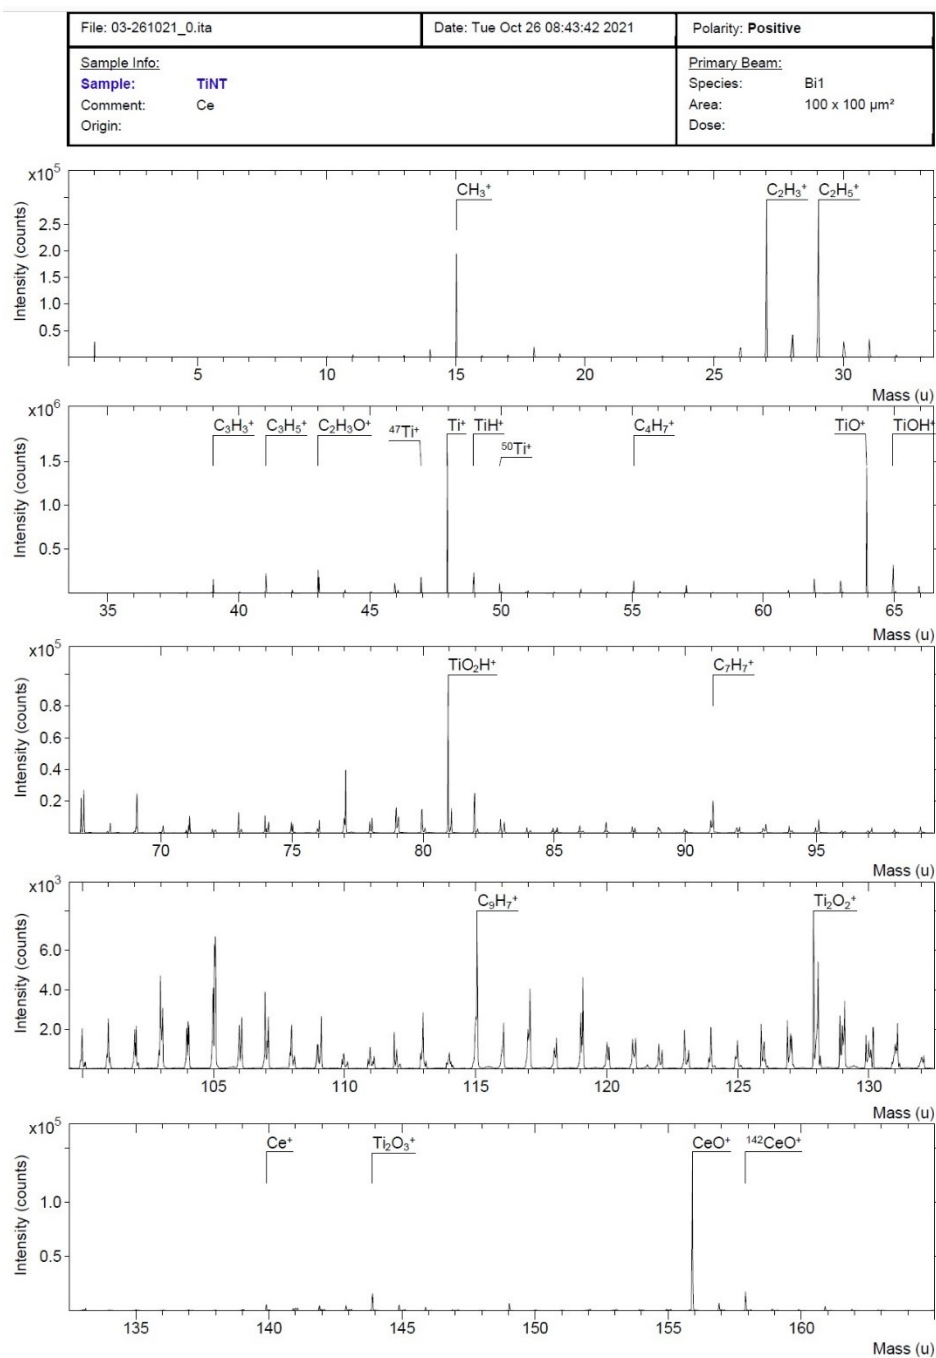**Figure S4b:** SIMS of Ce-TNT.

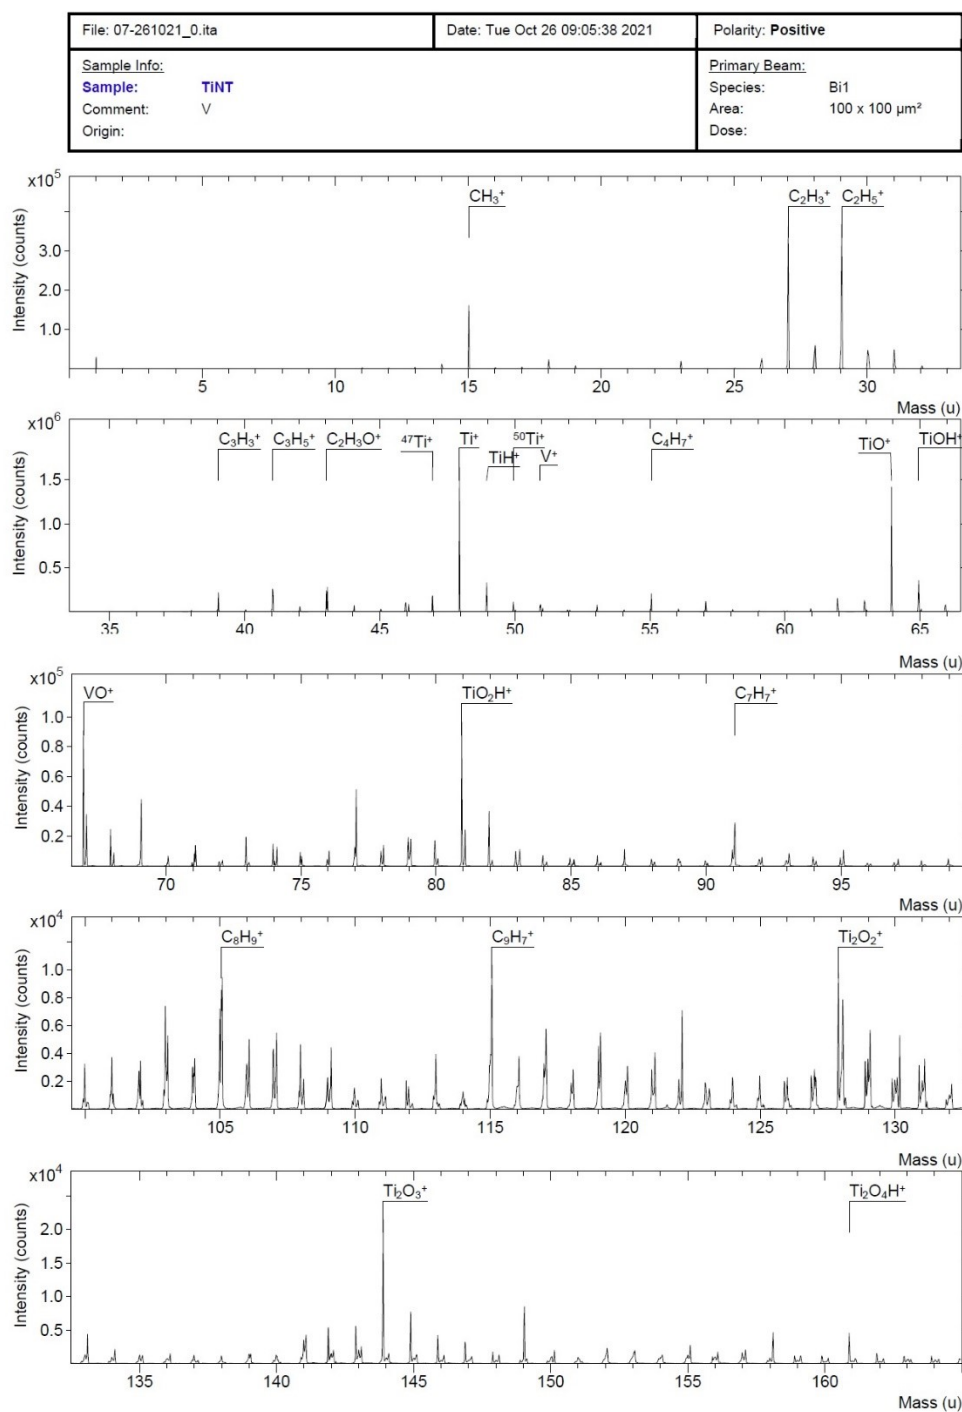

Figure S4c: SIMS of V-TNT.



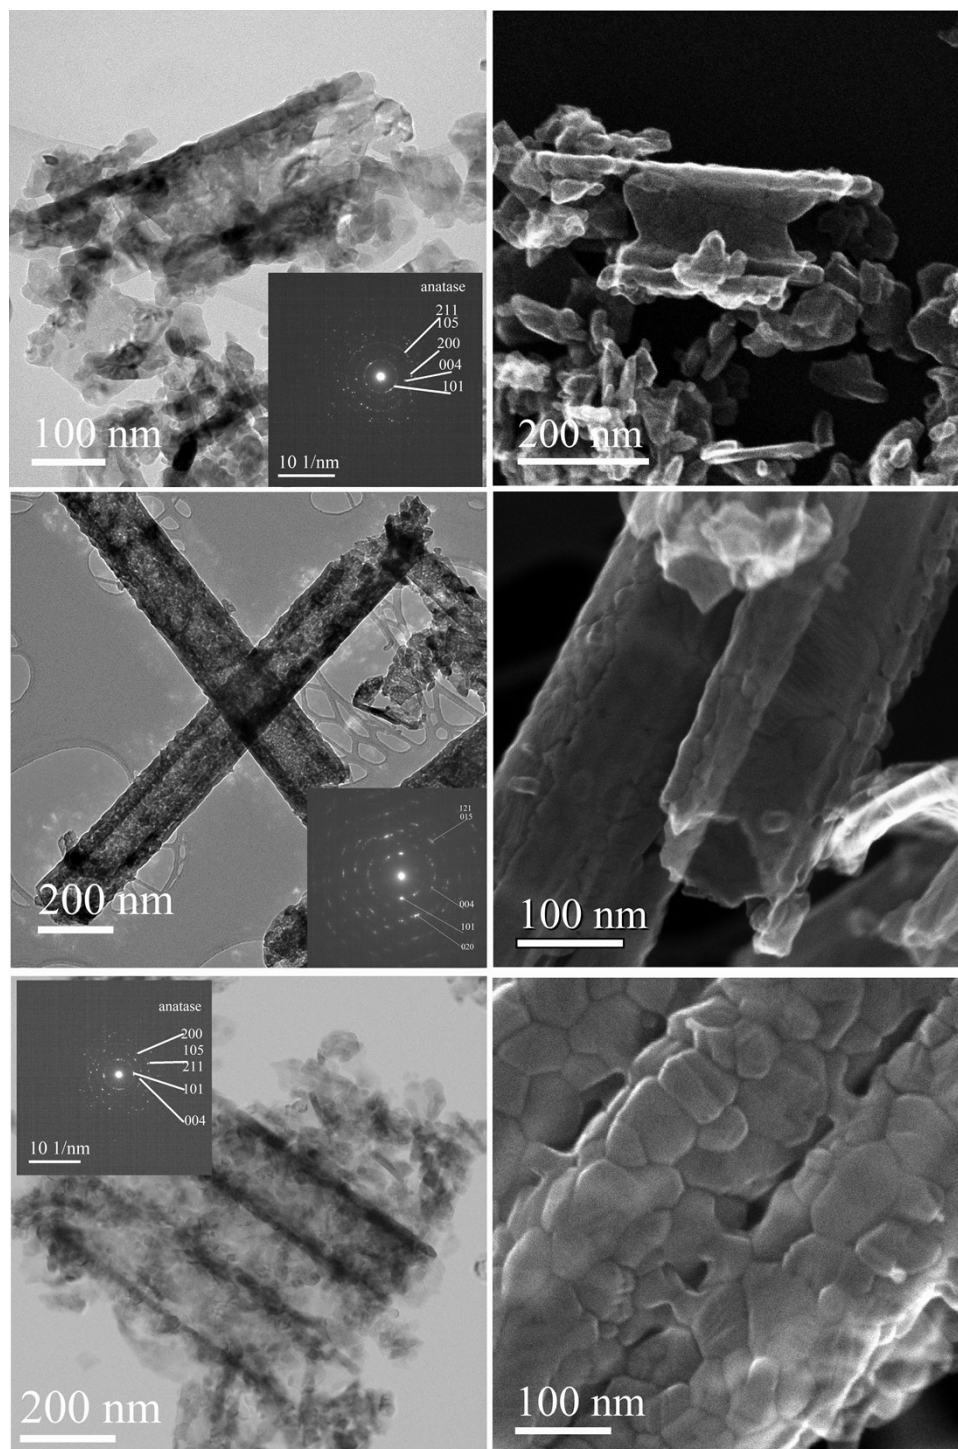

**Figure S5:** Low-magnification STEM images of nanotube fragments of (a,b) TNT, (c,d) V-TNT, (e,f) Ce-TNT. The inserts correspond to SAED patterns confirming the presence of anatase.

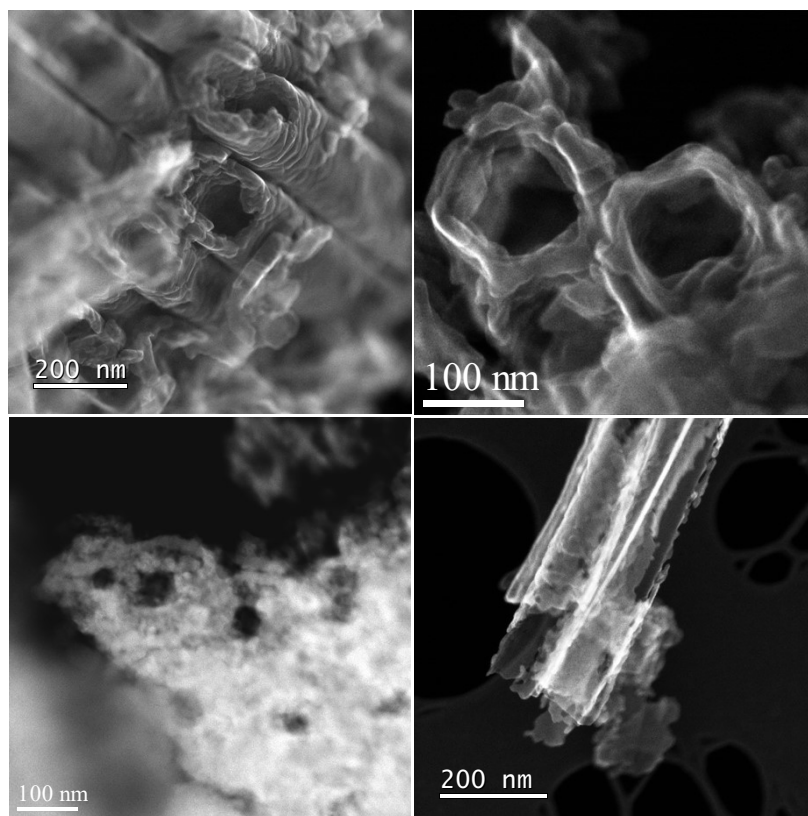

**Figure S6:** (a) STEM image of nanotube in TNT (nanotube diameter of 180 nm). (b) STEM images of a single-walled region of nanotube in Ce-TNT acquired at the upper portion of the nanotube (diameter of 113 nm). (c) STEM image of a double-walled nanotube in Ce-TNT acquired at the bottom portion of the nanotube (outer and inner diameters of 170 and 75 nm, respectively). (d) STEM image of nanotubes in V-TNT acquired at the upper part and exhibiting partially disintegrated single-walled nanotube.

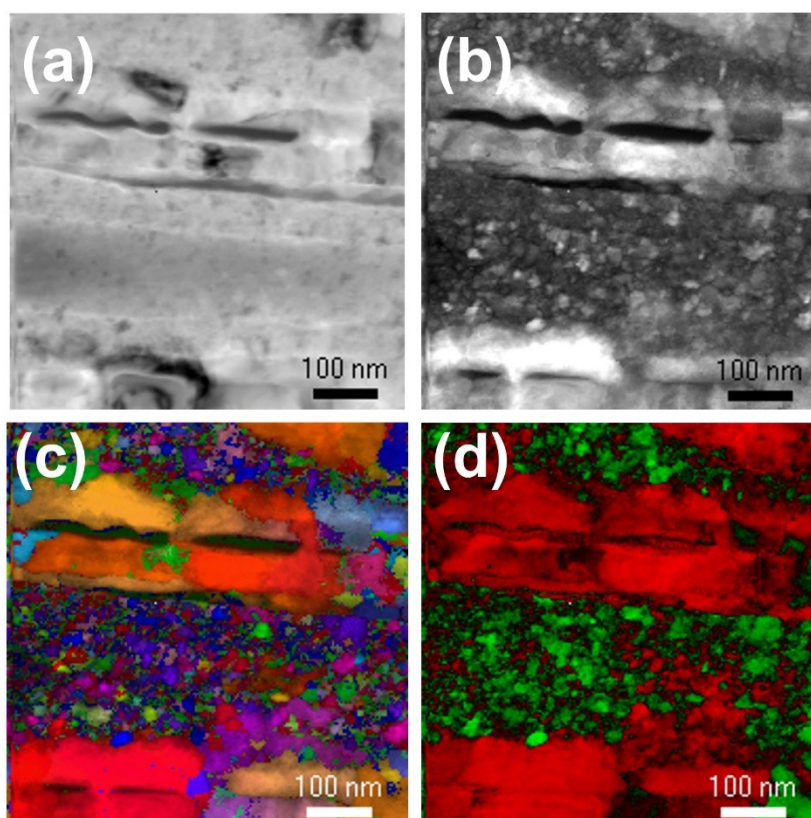

**Figure S7.** Automated crystal orientation and phase mapping of upper part of TiO<sub>2</sub> nanotubes: (a) Virtual bright field map, (b) index map, (c) overlaying of orientation in z-axis, reliability map and index map, and (d) superposition of phase, reliability and index maps with green and red color labels for rutile and anatase crystallites, respectively.

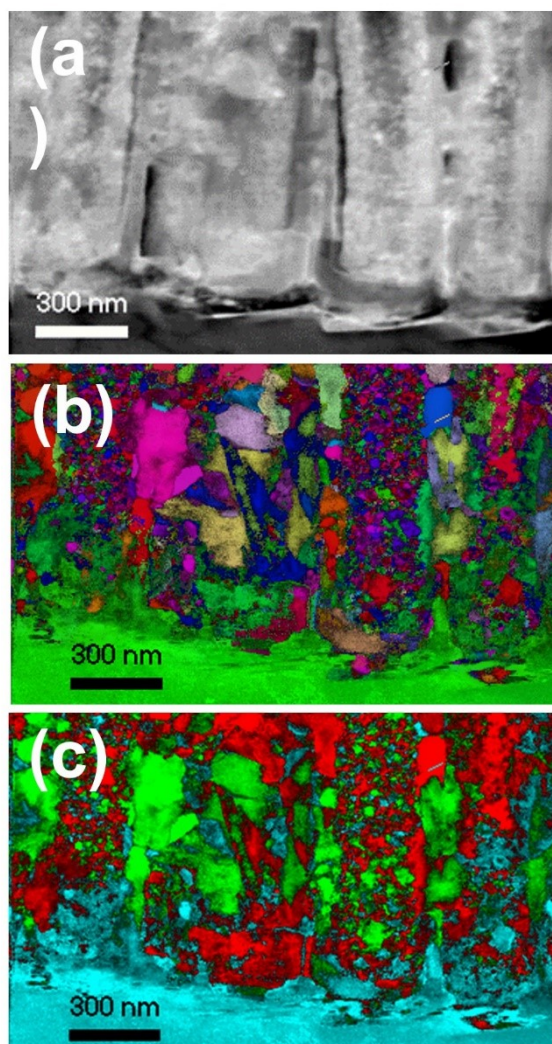

**Figure S8.** Automated crystal orientation and phase mapping of bottom part of TiO<sub>2</sub> nanotubes: (a) Virtual bright field map, (b) overlaying of orientation in z-axis, reliability map and index map, and (c) superposition of phase, reliability and index maps with blue, green and red color labels for metallic titanium, rutile and anatase crystallites, respectively.

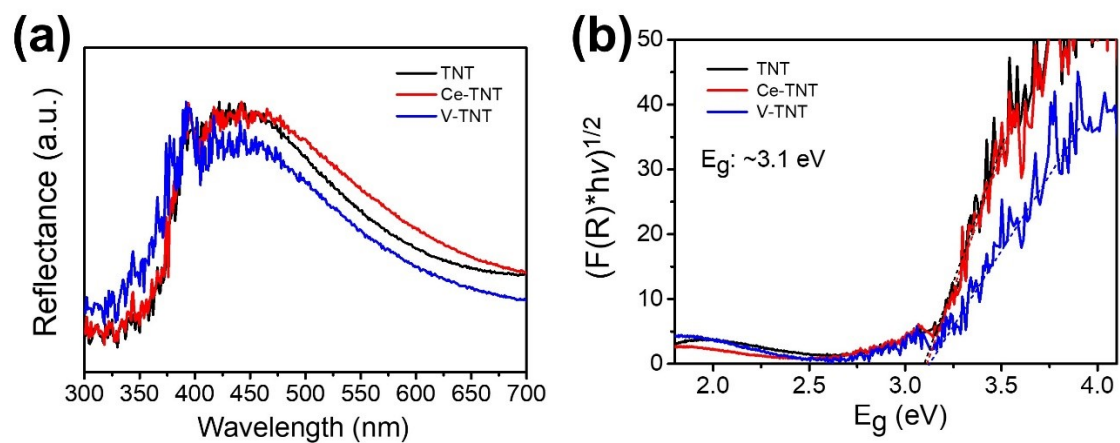

**Figure S9:** (a) DRS and (b) Tauc plot with the  $E_g$  of TNT, TNT/Ce, and TNT/V, respectively.

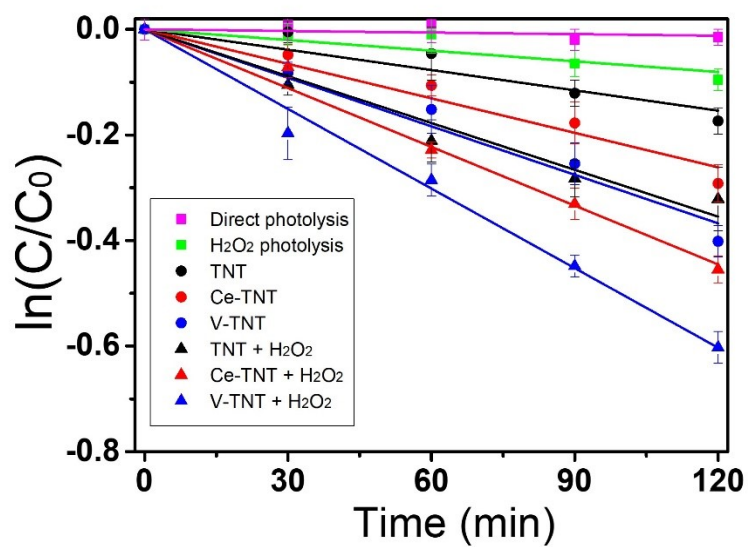

**Figure S10:** Degradation kinetic curves of CAF (20 ppm) during 2 h UVA irradiation by different photo-induced processes.
